# Supplementary material for: Selenzyme: enzyme selection tool for pathway design
Source: Oxford University Press journal article supplement (doi:10.1093/bioinformatics/bty065), 2018-02-06
Supplement: bioinformatics_34_12_2153_s2.pdf [file bioinformatics_34_12_2153_s2.pdf]

## **Supplementary data**

**A.1 Computing consensus direction for reactions**

**A.2 Querying Selenzyme for reaction and pathway sequence selection using KNIME workflows**

**A.3 Querying Selenzyme with a generalized reaction rule**

**A.4 Querying Selenzyme from RetroPath2.0 scope viewer**

**A.5 Additional references**

## A.1 Computing consensus direction for reactions

Reaction databases are often annotated in the less favorable direction (under physiological conditions). In order to determine the most plausible direction for a reaction when a preferred direction exists, some heuristics were applied based on curated information from MetaCyc and cofactor exchange pattern frequencies according to the EC number.

The algorithm is as follows:

- A.** Initial curated information about reaction direction was collected from MetaCyc.
- B.** Initial curated information about main reactants and cofactors for each reaction was collected from MetaCyc pathway information when available.
- C.** A list of currency metabolites was extracted based on frequency of occurrence in Metacyc and biochem4j and manually curated.
- D.** FOR each reaction in biochem4j:
  - a. Identify left and right cofactors and main reactants based on information from **A**, **B**, **C**.
- E.** FOR each EC number in biochem4j:
  - a. FOR each reaction annotated with each EC:
    - i. Store frequency of left/right cofactor pairs from **A**, **B**, **C**.
- F.** FOR each reaction in biochem4j:
  - a. IF direction information from MetaCyc available:
    - i. SET MetaCyc direction from **B**.
  - b. ELSE
    - i. IF reaction has annotated EC number and left/right cofactor pair in *E* for annotated EC:
      - 1. SET direction with highest frequency from **E**.

## A.2 Querying Selenzyme for reaction and pathway sequence selection using KNIME workflows

This example case shows the use of KNIME workflows to interface with Selenzyme. Figure A1 shows an example of enzyme sequence selection for two types of queries: a target reaction and a pathway involving multiple reactions. The workflows are available at <http://www.myexperiment.org/packs/734>.

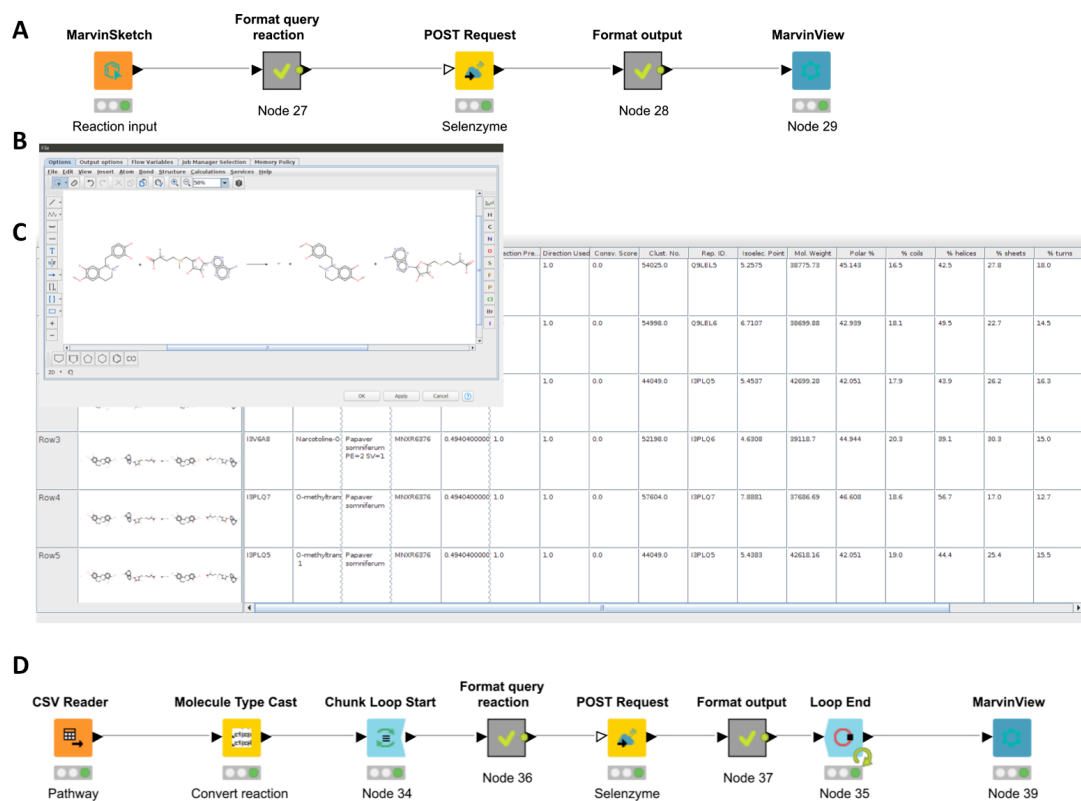

**Figure A1.** Example of application of the Selenzyme node in KNIME for reaction and pathway enzyme selection. **(A)** The reaction is submitted to Selenzyme as a SMARTS query through the RESTful service at <http://selenzyme.synbiochem.co.uk>. **(B)** The query reaction is sketched using a chemical editor. **(C)** The output of the workflow provides a table containing the top selected sequences and information about their properties. **(D)** Another application of Selenzyme is for querying a collection of reactions, typically a multi-step pathway that can be iteratively queried through a loop.

### A.3 Querying Selenzyme with a generalized reaction rule

An application example of querying for enzyme sequences from a generalized reaction rule. We take as an example the first reaction rule from the set of reaction operators that was used in Yim *et al.*, 2011. The associated diagram is shown in Figure A2 and an example output table in Table A1.

Operator class: 1.1.1.-

Description: Oxidoreductase (alcohol to ketone)

Reaction SMARTS:

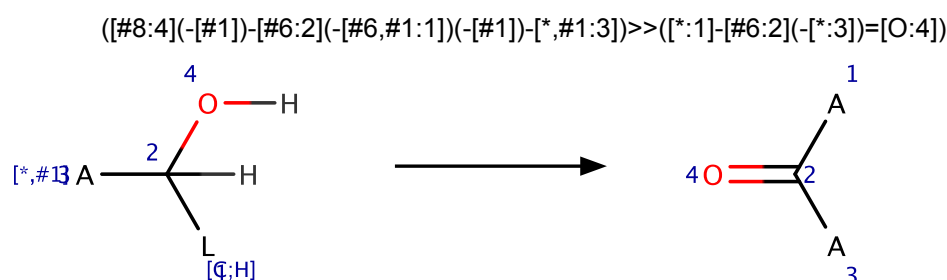

**Figure A2.** Diagram corresponding to the reaction SMARTS of the operator class 1.1.1.-. The diagram was generated using MarvinView (ChemAxon Ltd.).

| Score   | Seq. ID | Description                                 | Organism Source                                                                         | Tax. distance | Rxn. ID  | EC Number | Consv. Score | Rxn Sim. |
|---------|---------|---------------------------------------------|-----------------------------------------------------------------------------------------|---------------|----------|-----------|--------------|----------|
| 121.536 | B1LIP1  | S-(hydroxymethyl)glutathione dehydrogenase  | Escherichia coli (strain SMS-3-5 / SECEC)                                               | 3             | MNXR8926 | 1.1.1.1   | 50           | 0.74536  |
| 121.536 | A7ZX04  | S-(hydroxymethyl)glutathione dehydrogenase  | Escherichia coli O9:H4 (strain HS)                                                      | 3             | MNXR8926 | 1.1.1.1   | 50           | 0.74536  |
| 121.536 | Q0TKS7  | S-(hydroxymethyl)glutathione dehydrogenase  | Escherichia coli O6:K15:H31 (strain 536 / UPEC)                                         | 3             | MNXR8926 | 1.1.1.1   | 50           | 0.74536  |
| 113.536 | P39450  | S-(hydroxymethyl)glutathione dehydrogenase  | Photobacterium damsela subsp. piscicida                                                 | 11            | MNXR8926 | 1.1.1.1   | 50           | 0.74536  |
| 98.536  | P81431  | Alcohol dehydrogenase class-3               | Octopus vulgaris PE=1 SV=1                                                              | 26            | MNXR8926 | 1.1.1.1   | 50           | 0.74536  |
| 94.536  | Q99W07  | Alcohol dehydrogenase                       | Staphylococcus aureus (strain Mu50 / ATCC 700699)                                       | 17            | MNXR8926 | 1.1.1.1   | 37           | 0.74536  |
| 91.536  | P14675  | Alcohol dehydrogenase 3                     | Solanum tuberosum                                                                       | 30            | MNXR8926 | 1.1.1.1   | 47           | 0.74536  |
| 91.536  | P9WQC2  | Probable alcohol dehydrogenase adh          | Mycobacterium tuberculosis (strain CDC 1551 / Oshkosh)                                  | 17            | MNXR8926 | 1.1.1.1   | 34           | 0.74536  |
| 90.536  | P0DIA2  | Alcohol dehydrogenase 2                     | Zymomonas mobilis subsp. mobilis (strain ATCC 31821 / ZM4 / CP4)                        | 14            | MNXR8926 | 1.1.1.1   | 30           | 0.74536  |
| 90.536  | Q6XQ67  | Alcohol dehydrogenase 5                     | Saccharomyces pastorianus                                                               | 21            | MNXR8926 | 1.1.1.1   | 37           | 0.74536  |
| 90.536  | G5EGA6  | Dehydrogenase/reductase SDR family member 4 | Caenorhabditis elegans                                                                  | 24            | MNXR7089 | 1.1.1.184 | 40           | 0.74536  |
| 89.536  | Q8VZ49  | Alcohol dehydrogenase-like 4                | Arabidopsis thaliana                                                                    | 29            | MNXR8926 | 1.1.1.1   | 44           | 0.74536  |
| 89.536  | Q0V7W6  | Alcohol dehydrogenase-like 5                | Arabidopsis thaliana                                                                    | 29            | MNXR8926 | 1.1.1.1   | 44           | 0.74536  |
| 89.536  | Q75ZX4  | Alcohol dehydrogenase 1                     | Oryza sativa subsp. indica                                                              | 31            | MNXR8926 | 1.1.1.1   | 46           | 0.74536  |
| 88.536  | P74308  | Aldo/keto reductase slr0942                 | Synechocystis sp. (strain PCC 6803 / Kazusa)                                            | 16            | MNXR7089 | 1.1.1.184 | 30           | 0.74536  |
| 88.536  | Q03505  | Alcohol dehydrogenase 1                     | Oryctolagus cuniculus                                                                   | 35            | MNXR8926 | 1.1.1.1   | 49           | 0.74536  |
| 87.536  | P41747  | Alcohol dehydrogenase 1                     | Aspergillus flavus (strain ATCC 200026 / FGSC A1120 / NRRL 3357 / JCM 12722 / SRRC 167) | 24            | MNXR8926 | 1.1.1.1   | 37           | 0.74536  |
| 86.536  | Q28960  | Carbonyl reductase [NADPH] 1                | Sus scrofa                                                                              | 35            | MNXR7089 | 1.1.1.184 | 47           | 0.74536  |
| 85.536  | Q8WNV7  | Dehydrogenase/reductase SDR family member 4 | Sus scrofa                                                                              | 35            | MNXR7089 | 1.1.1.184 | 46           | 0.74536  |
| 85.536  | Q64413  | Alcohol dehydrogenase 1                     | Geomys bursarius                                                                        | 36            | MNXR8926 | 1.1.1.1   | 47           | 0.74536  |

**Table A1.** Top sequence candidates in results table for the generalized reaction operator of EC 1.1.1.- (detail).

#### A.4 Querying Selenzyme from RetroPath2.0 scope viewer

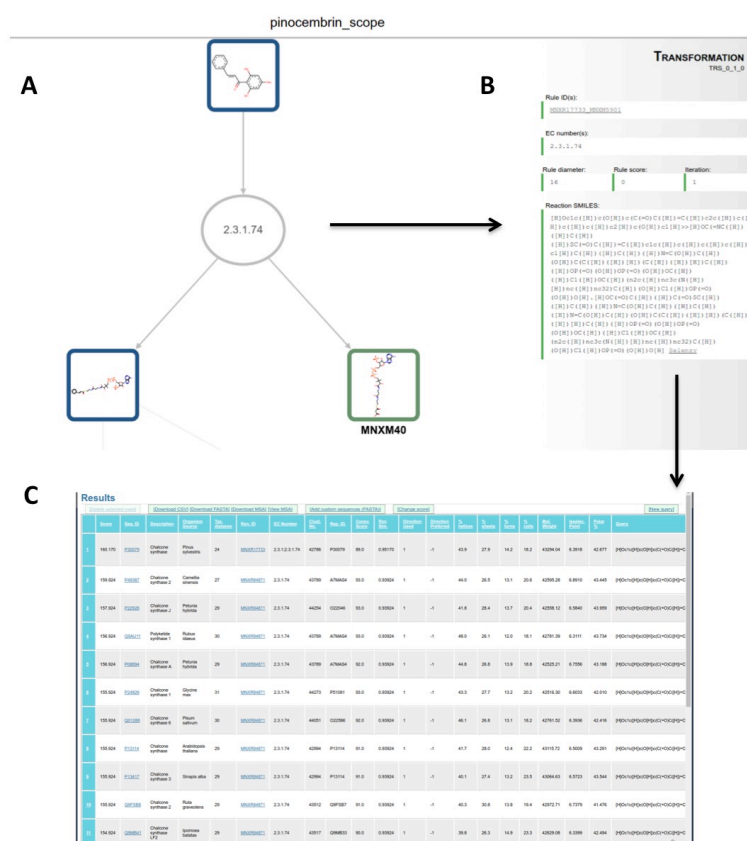

**Figure A3.** Retrieving sequence selection information for individual steps in the metabolic scope from *Escherichia coli* to pinocembrin in RetroPath2.0. **(A)** An reaction step is zoomed in the viewer. **(B)** Clicking in the enzyme provides information and a link to Selenzyme. **(C)** The link generates a table of selected sequences for the reaction step.

RetroPath2.0 (Delepine et al., 2017) computes the metabolic scope, i.e., the set of heterologous reactions connecting the chassis with the target, between a chassis organism and target compounds. A simple modification of the RetroPath2.0 scope viewer (Figure A3) by adding a link to the Selenzyme RESTful service that queries the SMARTS string of the reaction can be used for further investigation of each catalytic step and selection of candidate sequences.

## A.5 Additional references

Yim, H. *et al.* (2011) Metabolic engineering of *Escherichia coli* for direct production of 1,4-butanediol. *Nat. Chem. Biol.*, **7**, 445–452.
